# Supplementary material for: Free-standing Pt–Ni nanowires catalyst for H2 generation from hydrous hydrazine
Source: Royal Society of Chemistry journal article supplement (doi:10.1039/d0cc07372e), 2020-12-10
Supplement: d0cc07372e1.pdf [file d0cc07372e1.pdf]

**Free-standing Pt-Ni nanowires catalyst for H<sub>2</sub> generation from hydrous hydrazine**

Yu-Ping Qiu,<sup>†</sup> Liang-Liang Zhou,<sup>†</sup> Qing Shi and Ping Wang<sup>\*</sup>

*School of Materials Science and Engineering, South China University of Technology,  
Guangzhou 510641, P.R. China*

<sup>\*</sup>Corresponding author. E-mail: mspwang@scut.edu.cn

<sup>†</sup> These authors contributed equally to this work.

## **Experimental section**

### ***Catalyst preparation***

Pt-Ni nanowire samples with tunable compositions were synthesized using a solvothermal method. In a typical procedure, the mixture of chloroplatinic acid ( $\text{H}_2\text{PtCl}_6 \cdot \text{H}_2\text{O}$ , Pt content  $\geq 37.5\%$ ) and nickel acetylacetonate ( $\text{Ni}(\text{acac})_2$ , 95%) with varied molar ratios together with 20 mmol of potassium hydroxide (KOH, 97%) were dissolved in 30 mL of 1:1 (v/v) mixture of *N,N*-dimethylmethanamide (DMF, 99.8%) and ethylene glycol (EG, 98%) under magnetic stirring and sonication at room temperature for 4 h. The yielded transparent solution was then transferred into a 50 ml Teflon-lined autoclave and heated at 170 °C for 4 h with no intentional control of ramping or cooling rate. The collected product by centrifugation at 6000 rpm was thoroughly washed with deionized (DI) water (with a resistivity of 18 M $\Omega$  at 25 °C) and ethanol and finally dried at 60 °C under dynamic vacuum for 6 h. For comparison, pure Ni catalyst was fabricated by reduction of NiO at 300 °C under  $\text{H}_2$  atmosphere for 1 h, and a physical mixture sample was also fabricated by grinding the powder mixture of pure Pt and Ni with a molar ratio of 3:2.

### ***Catalyst characterization***

The phase structure of the catalyst samples was analyzed by X-ray diffraction (XRD) on a Rigaku RINT 2000 instrument. The morphology and microstructure of the samples were characterized by transmission electron microscopy (TEM, JEOL-2100F) equipped with an energy dispersive X-ray spectroscopy (EDS) unit. The surface composition and chemical states of the constituent elements of the catalysts were analyzed using X-ray photoelectron spectroscopy (XPS, Thermo Scientific K-ALPHA<sup>+</sup>). In the XPS analyses, the binding energies (BEs) were calibrated against the C 1s line at 284.8 eV of the adventitious carbon. A quantitative elemental analysis was conducted by inductively coupled plasma-atomic emission spectrometry (ICP-AES) on an Iris Intrepid instrument. The on-line thermogravimetric-mass spectrometry (TG-MS) analyses of the gases evolved from the sample were conducted using a Netzsch STA449F3-QMS403 thermal analyses system.

### ***Catalytic performance testing***

The catalytic properties of the catalysts towards  $\text{N}_2\text{H}_4 \cdot \text{H}_2\text{O}$  decomposition were measured in a two-necked round-bottomed flask. In a typical run, the flask containing

the catalyst and an alkaline aqueous solution was preheated and hold at the designated temperature under magnetic stirring. After injection of  $N_2H_4 \cdot H_2O$  into the flask, the decomposition reaction was immediately initiated. The generated gaseous products were allowed to pass through a 1.0 M hydrochloric acid (HCl) solution to absorb ammonia, if any, and were then measured by the water-displacement method using an electronic balance with a precision of  $\pm 0.01$  g. All the measurements were carried out in a solution of 0.50 M  $N_2H_4 \cdot H_2O$  and 2.0 M NaOH and the molar ratio of  $N_2H_4 \cdot H_2O$  to catalyst was fixed at 13:1. The  $H_2$  selectivity (X) was calculated following Eq 1, which was derived from the equations describing the decomposition reactions of  $N_2H_4 \cdot H_2O$ . The reaction rate at a conversion level of 50% was determined, assuming that all the Ni atoms take part in the catalytic reaction.

$$X = \frac{3Y - 1}{8} \left[ Y = \frac{n(N_2 + H_2)}{n(N_2H_4)} \right] \quad (1)$$

The turnover frequency (TOF) was calculated from Eq. 2,

$$TOF = \frac{n_{N_2H_4}}{n_{metal} \times t} \quad (2)$$

where  $n(N_2H_4)$  is the consumed quantity of  $N_2H_4$  when the conversion reaches 50%,  $n(metal)$  is the quantity of active metal atoms in the catalyst, and  $t$  is the reaction time at a conversion of 50%. In the present study, the TOF values were calculated based on Ni, Pt and Ni+Pt atoms, respectively.

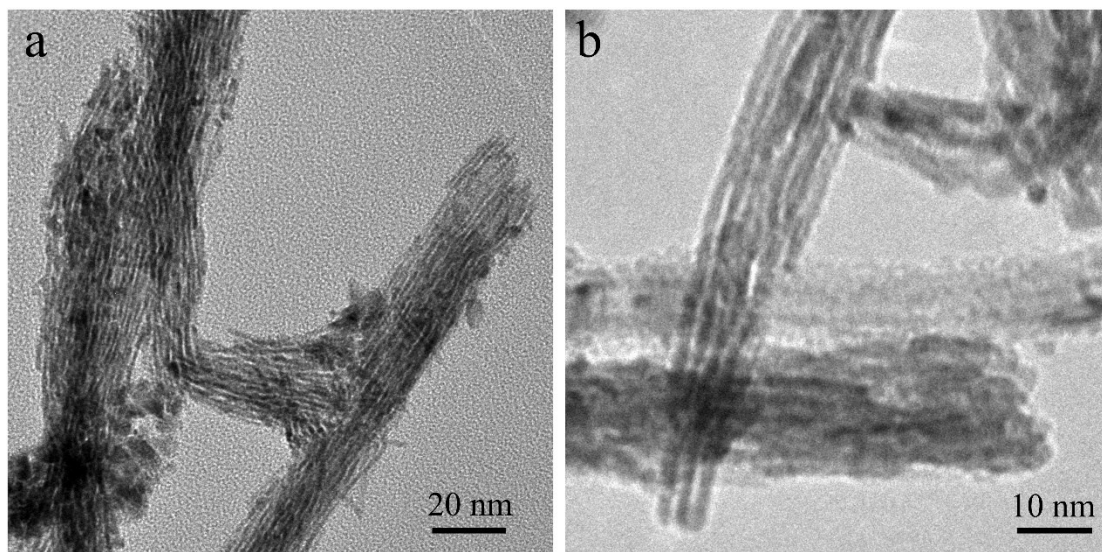

**Fig. S1** Representative TEM images of  $\text{Pt}_3\text{Ni}_2$  nanowires sample.

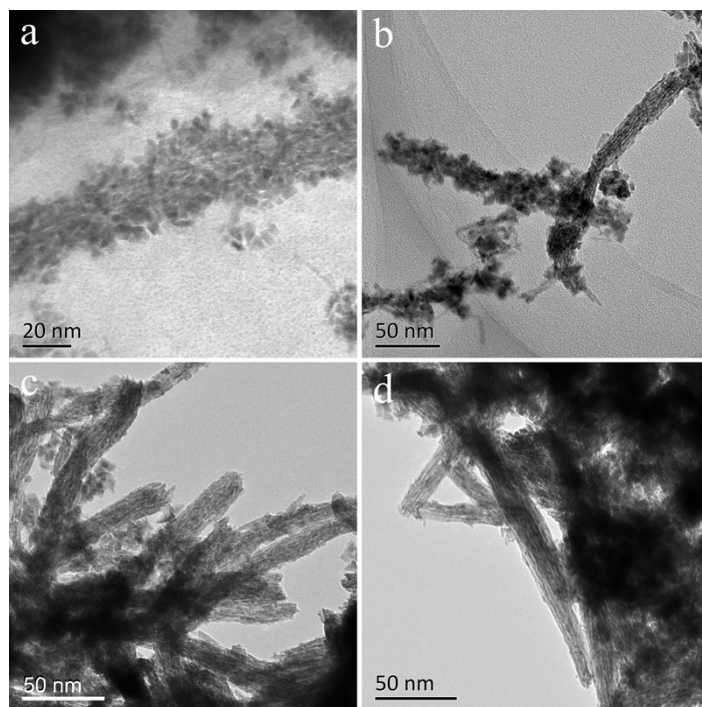

**Fig. S2** TEM images of the Pt<sub>3</sub>Ni<sub>2</sub> samples collected at different reaction durations. (a) 10 min; (b) 1 h; (c) 4 h; (d) 8 h.

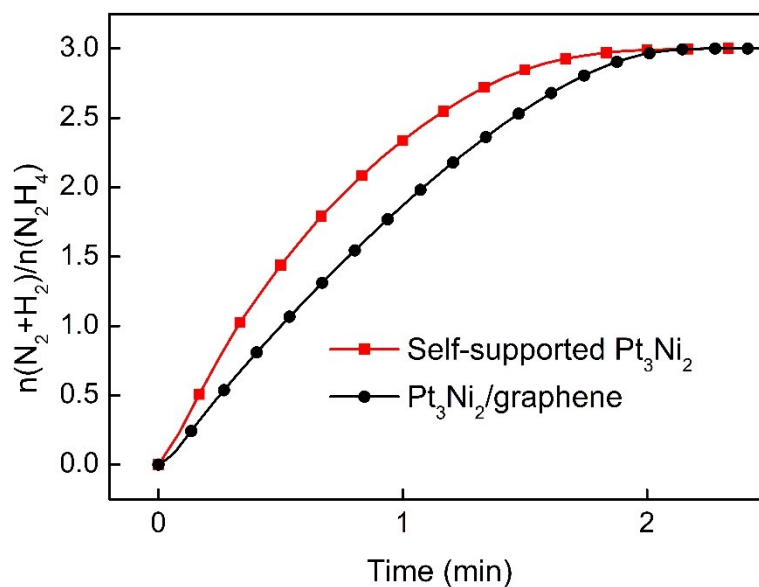

**Fig. S3** Kinetic curves of  $\text{N}_2\text{H}_4\cdot\text{H}_2\text{O}$  decomposition over self-supported  $\text{Pt}_3\text{Ni}_2$  and  $\text{Pt}_3\text{Ni}_2/\text{graphene}$  catalysts at  $50\text{ }^\circ\text{C}$ . The measurements were conducted in 1 mL of aqueous solution containing 0.50 M  $\text{N}_2\text{H}_4\cdot\text{H}_2\text{O}$  and 2.0 M NaOH. The catalyst/ $\text{N}_2\text{H}_4\cdot\text{H}_2\text{O}$  molar ratio was fixed at 1:13. It was observed that the two catalysts showed similar catalytic performance towards  $\text{N}_2\text{H}_4\cdot\text{H}_2\text{O}$  decomposition.

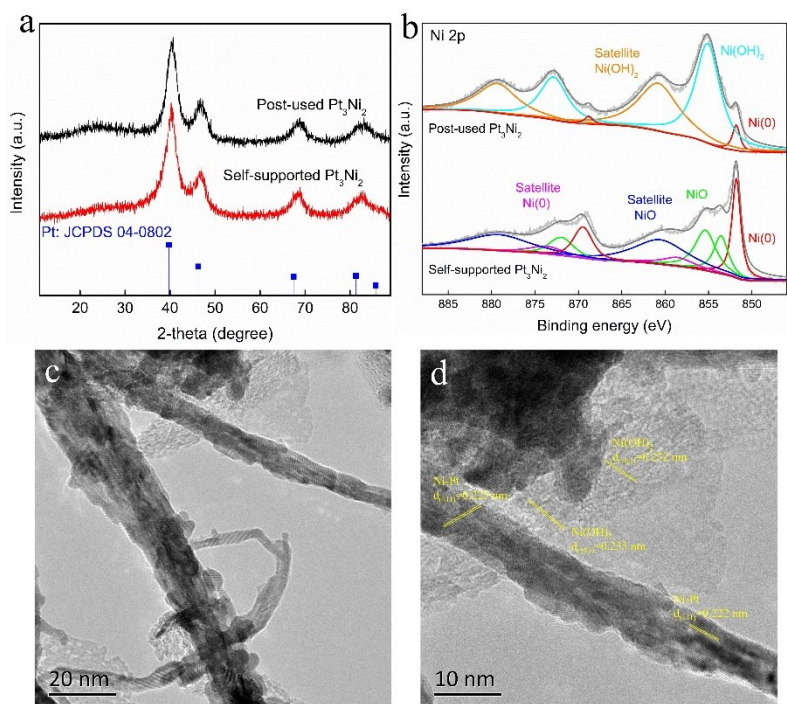

**Fig. S4** (a) XRD patterns and (b) XPS spectra of the as-prepared and post-used Pt<sub>3</sub>Ni<sub>2</sub> nanowires catalyst; (c, d) TEM images at different magnifications of the post-used Pt<sub>3</sub>Ni<sub>2</sub> nanowires catalyst.

**Table S1.** Chemical composition of the catalysts.

| Catalyst                                                             | Pt/Ni atomic ratio |
|----------------------------------------------------------------------|--------------------|
| PtNi nanowires <sup>a</sup>                                          | 1.19               |
| Pt <sub>3</sub> Ni <sub>2</sub> nanowires (as-prepared) <sup>a</sup> | 1.86               |
| Pt <sub>3</sub> Ni <sub>2</sub> nanowires (as-prepared) <sup>b</sup> | 1.68               |
| Pt <sub>3</sub> Ni <sub>2</sub> nanowires (post-used) <sup>b</sup>   | 1.73               |
| Pt <sub>3</sub> Ni nanowires <sup>a</sup>                            | 4.35               |

<sup>a</sup> Determined by ICP-AES.

<sup>b</sup> Determined by XPS.

**Table S2.** A comparison of catalytic performance of self-supported Pt<sub>3</sub>Ni<sub>2</sub> nanowires and relevant catalysts reported in literatures for N<sub>2</sub>H<sub>4</sub>·H<sub>2</sub>O decomposition.

| Catalyst                                                                                   | Temperature (°C) | TOF (h <sup>-1</sup> ) <sup>a</sup> | TOF (h <sup>-1</sup> ) <sup>b</sup> | TOF (h <sup>-1</sup> ) <sup>c</sup> | Ref.      |
|--------------------------------------------------------------------------------------------|------------------|-------------------------------------|-------------------------------------|-------------------------------------|-----------|
| Rh <sub>0.8</sub> Ni <sub>0.2</sub> /MIL-101                                               | 50               | /                                   | /                                   | 428.6                               | 1         |
| Ni <sub>60</sub> Pt <sub>40</sub> /NC                                                      | 50               | 1602                                | /                                   | /                                   | 2         |
| NiPt <sub>0.057</sub> /Al <sub>2</sub> O <sub>3</sub>                                      | 30               | 16.5                                | /                                   | /                                   | 3         |
| Rh <sub>47</sub> Ni <sub>18</sub> P <sub>35</sub> @MOF-74                                  | 50               | /                                   | /                                   | 715.4                               | 4         |
| Rh <sub>58</sub> Ni <sub>42</sub> @MIL-101                                                 | 50               | /                                   | /                                   | 344                                 | 5         |
| Pt <sub>0.5</sub> Ni <sub>0.5</sub> /NGNs-850                                              | 50               | /                                   | /                                   | 943                                 | 6         |
| (Ni <sub>3</sub> Pt <sub>7</sub> ) <sub>0.5</sub> -(MnO <sub>x</sub> ) <sub>0.5</sub> /NPC | 50               | /                                   | /                                   | 706                                 | 7         |
| Ni <sub>0.6</sub> Pt <sub>0.4</sub> -MoO <sub>x</sub>                                      | 50               | /                                   | /                                   | 822                                 | 8         |
| Pt <sub>3</sub> Ni <sub>2</sub> nanowires                                                  | 50               | 726                                 | 484                                 | 290                                 | This work |

<sup>a</sup> Calculated based on Ni atoms.

<sup>b</sup> Calculated based on noble metal atoms.

<sup>c</sup> Calculated based on Ni and noble metal atoms.

## References

1. Z. Zhang, S. Zhang, Q. Yao, G. Feng, M. Zhu and Z. H. Lu, *Inorg. Chem. Front.*, 2018, **5**, 370.
2. Y. P. Qiu, Q. Shi, L. L. Zhou, M. H. Chen, C. Chen, P. P. Tang, G. S. Walker and P. Wang, *ACS Appl. Mater. Interfaces*, 2020, **12**, 18617.
3. L. He, Y. Huang, A. Wang, Y. Liu, X. Liu, X. Chen, J. J. Delgado, X. Wang and T. Zhang, *J. Catal.*, 2013, **298**, 1.
4. R. Jiang, X. Qu, F. Zeng, Q. Li, X. Zheng, Z. Xu and J. Peng, *Int. J. Hydrogen Energy*, 2019, **44**, 6383.



5. P. Zhao, N. Cao, W. Luo and G. Cheng, *J. Mater. Chem. A*, 2015, **3**, 12468.
6. A. Kumar, X. Yang and Q. Xu, *J. Mater. Chem. A*, 2019, **7**, 112.
7. B. Xia, T. Liu, W. Luo and G. Cheng, *J. Mater. Chem. A*, 2016, **4**, 5616.
8. Q. Yao, M. He, X. Hong, X. Zhang and Z. H. Lu, *Inorg. Chem. Front.*, 2019, **6**, 1546.
